# Supplementary material
Source: PubMed Central journal article supplement (PMC9703954)
Supplement: NIHMS1847561-supplement-Supplemental_Material.pdf [file NIHMS1847561-supplement-Supplemental_Material.pdf]

# Supplemental material for: Individual Differences in Symptoms of Maternal Depression and Associations with Parenting Behavior

Supplemental table 1

*Bivariate correlations and descriptive statistics for study variables*

|                               | 1       | 2       | 3       | 4       | 5      | 6      | 7      | 8       | 9      | 10     | 11      | 12      | 13      | 14      | 15      | 16      | 17      | 18      | 19      | 20      | 21    |
|-------------------------------|---------|---------|---------|---------|--------|--------|--------|---------|--------|--------|---------|---------|---------|---------|---------|---------|---------|---------|---------|---------|-------|
| Age 2 variables               |         |         |         |         |        |        |        |         |        |        |         |         |         |         |         |         |         |         |         |         |       |
| 1. Rural                      | 1.00    |         |         |         |        |        |        |         |        |        |         |         |         |         |         |         |         |         |         |         |       |
| 2. Suburban                   | -.45*** | 1.00    |         |         |        |        |        |         |        |        |         |         |         |         |         |         |         |         |         |         |       |
| 3. Urban                      | -.46*** | -.59**  | 1.00    |         |        |        |        |         |        |        |         |         |         |         |         |         |         |         |         |         |       |
| 4. Monthly income             | .04     | .02     | -.06    | 1.00    |        |        |        |         |        |        |         |         |         |         |         |         |         |         |         |         |       |
| 5. Intervention status        | .01     | .00     | .00     | .03     | 1.00   |        |        |         |        |        |         |         |         |         |         |         |         |         |         |         |       |
| 6. Maternal depression total  | -.12*** | .01     | .11**   | -.14*** | .02    | 1.00   |        |         |        |        |         |         |         |         |         |         |         |         |         |         |       |
| 7. Depressed affect           | -.11**  | -.01    | .11**   | -.13*** | .00    | .90*** | 1.00   |         |        |        |         |         |         |         |         |         |         |         |         |         |       |
| 8. Positive affect            | -.09*   | -.03    | .11**   | -.09*   | .05    | .69*** | .55*** | 1.00    |        |        |         |         |         |         |         |         |         |         |         |         |       |
| 9. Interpersonal              | -.05    | .04     | .01     | -.15*** | .01    | .56*** | .45*** | .29***  | 1.00   |        |         |         |         |         |         |         |         |         |         |         |       |
| 10. Physical                  | -.12**  | .02     | .09*    | -.07    | .02    | .79*** | .61*** | .33***  | .34*** | 1.00   |         |         |         |         |         |         |         |         |         |         |       |
| 11. Harsh parenting           | -.06    | -.11**  | .16***  | -.08*   | .03    | .12**  | .13*** | .07*    | .03    | .10**  | 1.00    |         |         |         |         |         |         |         |         |         |       |
| 12. Positive parent           | -.15*** | .36**   | -.22*** | .09*    | -.01   | -.05   | -.01   | -.14*** | .02    | -.05   | -.38*** | 1.00    |         |         |         |         |         |         |         |         |       |
| 13. Disengaged parenting      | -.07    | .01     | .05     | -.02    | .01    | .03    | -.03   | .09*    | -.02   | .02    | -.02    | -.44*** | 1.00    |         |         |         |         |         |         |         |       |
| Age 3 variables               |         |         |         |         |        |        |        |         |        |        |         |         |         |         |         |         |         |         |         |         |       |
| 14. Maternal depression total | -.04    | -.03    | .07     | -.10*   | -.07   | .42*** | .38*** | .33***  | .22*** | .32*** | .05     | -.06    | -.01    | 1.00    |         |         |         |         |         |         |       |
| 15. Depressed affect          | -.08    | .00     | .06     | -.12**  | -.07   | .40*** | .41*** | .27***  | .20*** | .30*** | .02     | -.04    | -.02    | .92***  | 1.00    |         |         |         |         |         |       |
| 16. Positive affect           | .04     | -.07    | .03     | -.06    | -.07   | .29*** | .24*** | .39***  | .16*** | .12**  | .05     | -.10*   | .01     | .71***  | .57***  | 1.00    |         |         |         |         |       |
| 17. Interpersonal             | -.02    | -.01    | .03     | -.05    | -.02   | .28*** | .25*** | .21***  | .32*** | .16*** | -.05    | -.06    | .03     | .59***  | .50***  | .35***  | 1.00    |         |         |         |       |
| 18. Physical                  | -.05    | -.05    | .10*    | -.08    | -.05   | .32*** | .27*** | .17***  | .19*** | .36*** | .05     | -.02    | -.02    | .82***  | .69***  | .38***  | .359**  | 1.00    |         |         |       |
| 19. Harsh parenting           | .08*    | -.18*** | .10*    | -.05    | .03    | -.02   | .00    | .01     | -.04   | .01    | .13***  | -.19*** | .01     | .05     | .03     | .08     | -.01    | 0.06    | 1.00    |         |       |
| 20. Positive parent           | -.04    | .35***  | -.31*** | .14***  | .07    | -.09*  | -.07   | -.10**  | -.07   | -.09*  | -.27*** | .54***  | -.28*** | -.17*** | -.14*** | -.16*** | -.125** | -.134** | -.382** | 1.00    |       |
| 21. Disengaged parenting      | -.07    | -.07    | .14**   | -.06    | -.12** | .08*   | .05    | .07     | .06    | .07    | .12**   | -.30*** | .40***  | .03     | .02     | .06     | 0.02    | 0.03    | 0.01    | -.517** | 1.00  |
| m                             | -       | -       | -       | 3.87    | -      | 16.74  | 0.85   | 0.76    | 0.42   | 1.21   | 0.00    | -0.01   | -0.01   | 15.39   | 0.71    | 0.84    | 0.39    | 1.02    | 0.00    | 0.00    | -0.01 |
| sd                            | -       | -       | -       | 2.13    | -      | 10.66  | 0.80   | 0.69    | 0.67   | 0.66   | 0.67    | 0.74    | 0.66    | 10.95   | 0.78    | 0.71    | 0.63    | 0.66    | 0.63    | 0.76    | 0.65  |

\*\*\* $p < .001$ . \*\* $p < .01$ . \* $p < .05$ .

Note. The site variables (Rural, Suburban, and Urban) are coded as 1=site, 0=all others. Intervention status is coded as 1=intervention group, 0=control group. The Positive affect subscale is reverse scored such that higher values correspond to less positive feelings.

Supplemental material for: Individual Differences in Symptoms of Maternal Depression and Associations with Parenting Behavior

Supplemental Table 2

*Fit Statistics and Classification Quality for Unconditional Models*

|           | AIC      | BIC-SSA  | BLRT      | <i>p</i> -value | Entropy | Posterior probabilities (range) |
|-----------|----------|----------|-----------|-----------------|---------|---------------------------------|
| 2-profile | 36713.23 | 36993.32 | -19898.23 | <.0001          | .937    | .965-.987                       |
| 3-profile | 35982.64 | 36359.16 | -18295.62 | <.0001          | .917    | .940-.976                       |
| 4-profile | 35782.50 | 36255.45 | -17909.32 | <.0001          | .913    | .911-.974                       |
| 5-profile | 35542.29 | 36111.65 | -17788.25 | <.0001          | .942    | .929-.990                       |
| 6-profile | 35345.22 | 36011.01 | -17610.66 | <.0001          | .919    | .833-.985                       |

*Note.* AIC=Akaike Information Criteria. BIC-SSA=Sample-size Adjusted Bayesian Information

Criteria. BLRT=Bootstrap Likelihood Ration Test.

Supplemental material for: Individual Differences in Symptoms of Maternal Depression and Associations with Parenting Behavior

Supplemental Table 3

*Fit Statistics and Classification Quality for Conditional Models*

|           | AIC      | BIC-SSA  | BLRT      | <i>p</i> -value | Entropy | Posterior probabilities<br>(range) |
|-----------|----------|----------|-----------|-----------------|---------|------------------------------------|
| 2-profile | 40525.06 | 40622.75 | -21758.47 | <.0001          | 0.935   | .970-.985                          |
| 3-profile | 39813.33 | 39944.52 | -20192.53 | <.0001          | 0.914   | .930-.975                          |
| 4-profile | 39608.87 | 39773.55 | -19812.66 | <.0001          | 0.914   | .927-.970                          |
| 5-profile | 39391.13 | 39589.31 | -19686.43 | <.0001          | 0.941   | .928-.994                          |
| 6-profile | 39186.83 | 39418.5  | -19531.30 | <.0001          | 0.936   | .848-.992                          |

*Note.* AIC=Akaike Information Criteria. BIC-SSA=Sample-size Adjusted Bayesian Information

Criteria.

BLRT=Bootstrap Likelihood Ration Test.
